# Supplementary material for: Genome-wide characterization of AhBAG genes in peanut reveals their role in bacterial wilt resistance and hormone response
Source: Research Square preprint supplement (doi:10.21203/rs.3.rs-6118821/v1), 2025-04-04
Supplement: Supplementary file 1 [file 16a3bdd67f7c9e7a5ca77b41.xlsx]

## Sheet: Table S1
All primers for in qRT-PCR
Name	Seqence 5'-3'
q-AhYSVF0U-F	GTGAAGTGTGATGCCCCTGA
q-AhYSVF0U-R	ATATCTCGCTCCGCATCACC
q-AhTEF0AP-F	TTCCTTGACATGGTTGGGGT
q-AhTEF0AP-R	TCAAAAGCAGACACCCTTCCT
q-Ah37JSRQ-F	CCGGCACCGACAATTAGAGT
q-Ah37JSRQ-R	AGGAACGCCTTTGAATCCCT
q-AhCF9SCE-F	GTTGTCTGGTCCAACTGGGT
q-AhCF9SCE-R	TGGACTTGGCAGCTTTTTCC
Actin7-F	TTGGAATGGGTCAGAAGGATGC
Actin7-R	AGTGGTGCCTCAGTAAGAAGC

## Sheet: Table S2
The biophysical properties of the peanut BAG genes
Gene name	CDS length	Amino acids number	Molecular weight(kDa)	Theoretical pI	Instability index	Aliphatic index	Grand average of hydropathicity	Localization
AhD7MIWJ	1023	340	39.7088	4.89	74.19	67.82	-0.96	chloroplast
AhG65IU1	1023	340	39.708	4.89	74.19	67.82	-0.96	chloroplast
AhII6FYR	2943	980	109.726	4.91	59.07	59.68	-1.028	chloroplast
AhYSVF0U	3711	1236	139.182	4.87	58.85	61.29	-1.049	chloroplast
Ah4JG1SZ	558	185	21.507	6.22	57.32	81.14	-0.611	nucleus
AhJ75SJQ	558	185	21.506	6.52	57.09	81.14	-0.611	nucleus
Ah35MDCZ	753	250	27.911	6.03	50.03	79.04	-0.464	chloroplast
Ah9JS9HJ	780	259	28.921	6.55	46.86	80.81	-0.42	nucleus
AhED3VG4	783	260	29.854	9.44	54.32	77.58	-0.752	nucleus
AhTEF0AP	1047	348	39.041	9.11	33.89	67.73	-0.832	nucleus
AhADAM8V	1047	348	39.014	9.12	33.84	67.73	-0.838	nucleus
Ah37JSRQ	1035	344	38.617	9.36	39.23	75.06	-0.708	peroxisome
AhCF9SCE	1068	355	40.009	9.5	37.27	74.11	-0.715	chloroplast

## Sheet: Table S3
The sequence of BAG proteins in different plants
Species	Protein name	Gene id (NCBI)	Amino acid sequence
Arabidopsis thaliana	AtBAG1	AT5G52060	MMKMMRNKPTNLPTAGMTNGGRGSGGGGGGGGRESGGRDLEIRPGGMLVQKRNPDLDPVGPPPPPMIRVRIKYGAVYHEINISPQASFGELKKMLTGPTGIHHQDQKLMYKDKERDSKAFLDVSGVKDKSKMVLIEDPLSQEKRFLEMRKIAKTEKASKAISDISLEVDRLGGRVSAFEMVTKKGGKIAEKDLVTVIELLMNELIKLDAIVAEGDVKLQRKMQVKRVQNYVETLDALKVKNSMANGQQKQSSTAQRLAPIQEHNNEERQEQKPIQSLMDMPIQYKEKKQEIEEEPRNSGEGPFVLDSSAKWETFDHHPVTPLSSTTAKNNAIPPRFNWEFFD
	AtBAG2	AT5G62100	MMKMSIGTTTSGDGEMELRPGGMVVQKRTDHSSSVPRGIRVRVKYGSVHHEISINSQSTFGELKKILSGATGVHHQDMQIIYKDKERDSKMFLDLSGVKDRSKLILIEDPISQEKRLLELRKIATKEKSSKAISDISFQVERLAGQLSAFDTVIGKGGKVEEKNLENLMEMLMNQLVKLDAISGDGDVKLKKKMQNLMIRFTNCWKEERLHKYVEALDLLKIKNSRQPQTKPKPQYKEREMLTFYEEASRKPTASSSSPPVIITTRWETFDSSSASTATLQPVRPVHPKFKWELFN
	AtBAG3	AT5G07220	MMKMNTGTSPSVIGGGTSGNEWESRPGGMVVQRRTDQNSDVPRVFRVRVKYGSVYHEININSQSSFGELKKMLSDQVGLHHEDMKVLYKDKERDSKMFLDLCGVKDRSKLVVKEDPISQEKRLLAKRKNAAIEKASKSISDISFEVDRLAGQVSAFETVINKGGKVEEKSLVNLIEMLMNQLLRLDAIIADGDVKLMRKMQVQRVQKYVEALDLLKVKNSAKKVEVNKSVRHKPQTQTRFEQRDLLSFVEEEEEEPRNSNASSSSGTPAVVASKWEMFDSASTAKAAETVKPVPPRFKWEFFD
	AtBAG4	AT3G51780	MMHNSTEESEWEVRPGGMLVQRRDDAASSDHKPLQDPDSASAAFAQTIRITVSHGSSHHDLHISAHATFGDVKKALVQKTGLEASELKILFRGVERDDAEQLQAAGVKDASKLVVVVEDTNKRVEQQPPVVTKEMEKAIAAVNAVTGEVDKLSDRVVALEVAVNGGTQVAVREFDMAAELLMRQLLKLDGIEAEGDAKVQRKAEVRRIQNLQEAVDKLKARCSNPFVDQSKAAAVSTEWESFGNGVGSLNPPPPASPSANVTQDWEKFD
	AtBAG5	AT1G12060	MKRSRKFSSSTTTTTVIHTFYNDHTTPPATKEIPIETPLPATKANVKTNATAAAARIQSGYRSYRIRNLYKKISSINREANRVQSIIQRQETVDAIRSDEKERLRMNETLMALLLKLDSVPGLDPTIREARRKVSRKIVGMQEILDSISETKDEIQWWNYNDLGGVDSGQGGGAWPLYWEEAVEEEMCRERGGEEMERFCAQYLGFRCFQRFLRE
	AtBAG6	AT2G46240	MMPVYMDPSQPCQMRPQEYYYQGFGNNSQHMAMDAPPPCHGSCVHGNFPAYWPPCYPPQVPYHQCCMNRSAFHPPHASYAPSCYVHPPFPVGYQPWFDVEKDVPGKHHCGKCSSQMCDLKKDRGVVIEEHEPEIEKGEAVLPVRSTNCPYPIIWIPHENARNQEYRSSLGLGKHNQPPAEVRAPDNMTIQKSFPESWRGCFPFDESSMKSLVQNQDSKKAQNGKTVEAPFDISKFKSLLQGQDMKEAQIQKNKEELGQLTYPTSWVPSRRKRDDVEASESSNEDRKKMQNGKTVEYPFDISMIKSLIQGQDVKEAQNQKNKEEPGQVPYPIFWIPSYGKRKDVEASESKESSNEGRNLESCPSDLHRNEGQITQAKGKEGNFECNVLSDAEEKSSVINI…
	AtBAG7	AT5G62390	MTLFHRLDLIDPYTCTPLIVRETSIVEPSSLFLGFPSFIDEDIEDLFEFSSPNPLDLFETVTDLVKIKKSPSSCKYKVIRRRLEPEYPLKYLCDRVSDLESKFDRLVSPKSDRKYTLTKEIKGSGERKYKWEAEIQGPLERKYKLEAEIEGSGERKYRWTTEIKGGKKDEEGLKLAALKKEKAKAKAIAAAEAEKKKNKNKKKSYNWTTEVKSERENGEVSHTYIIKATTGGEKKKKHEEKEKKEKIETKSKKKEKTRVVVIEEEEEEDDESSEHGAIVLRKAFSRRNGAVRTKKGKNKEMPPEYAAVMIQRAFKAYLIRRSKSLRALRDLAIAKTKLKELRASFHNFSYRRLIARDGEERQKFSEKIIVLLLTVDAIEGVDVMVRGAKRSMVDELEAM…
Solanum lycopersicum	SIBAG1	Solyc01g095320	MYPTNPYQRNQVPYNPHYYPRFESNPHHHMNIDPTRSTLPYESWPCGGSNYRHPYPPECHSCCIHNTSPSQCAFSPPYPYLPPSTYNNCSYPTYPVMYPTHYVPHPHFTMEQPRYEYEKNMGRDHHCCGCSNHKCGSKKGGSSVKIEEHDQDKGNDCNDSLVPFGFNNCPYPVVCLPPDDMKNRERMKPDGSNCKEQEENPQPLKPLGDFRPSQQPNFWKLWPSHYGNSSGSPKENGDFPEKQHHDDAIRKQFPFPIIWMPYRPEEDREEVGKETESGLIAEKEPTSPSKLTKLMSHDSEDKRSSSKENEVNSGGDFHGKGLNKGSVVKTIPVKQVEQNEIFDGKKEEASQRHESDAKQKKITQEAGRKQSTSPTKSSKLPPVCLRVDPLPRKKSSSGN…
	SIBAG2	Solyc03g026220	MSRFRRFDIIDYSSSPSFFTPKTLLLNPYFHIEDELDCTLDLICPKPYAPNTFLDLENFDSITDLIQIETTPFYSTTRRVQHRIGLGTELQCLSDRVTALERMLTEKKKKNKIGERKYTWTAEIKSPEKDGVDRKYKWIAEVKDGKKKGALDKNYKFSAEIKGKGDDSRSYSFKASNVTDSDSDSDESQKKEKKDKMKKKKKSVGCTRLVEIEEPTHHGALVLRQVFAKRVEKRRGKRKELSPQDAALAIQMSFRAYLIKRSQALRALRELAIAKTKLKELRALFNNFTYRRRVARDAEERQRFSEKIIVLLLTVDAIEGVDMMVRSAKKSIVDELEAMLDVIDPQPGGRPLSVARRRTFDMPDGAIQKELAAGVAQVVRMLDESNGAETFEGCL
	SIBAG3	Solyc03g083970	MMRMKTKTTAMPPMMNDNSAGGRDRAAADNEWEVRPGGMLVQKRNPDAENRPPPPPIRVRVKYGSIYHEINISPQATFGELKKMLTGPTGLHHQDQKLLYKDKERDNNAFLDISGVKDKSKIVVVEDPLCQEKRYLELRKNAKMEKAAKTIADISFEVDRLAGQVSAFESIISKGAKVVEKDLVKVIELLMNQLLKLDGIVAEGDVKLQRKMQVKRVQKYVETLDVLKMKNSAPSRSGNHIPKQESSPSPQQHQRRYSNDQASSPVQNQNGSRRSFANSPTPAKHQEPSRHSASGSVVITTQWETFDPAPGPLLDHDSTTTPSNNNNHASYAQPRFNWDLL
	SIBAG4	Solyc04g014740	MHEIVVLVTCNANYMYAVSPIRSIKPFDCGNITSYYSSVDVDVSVGVGAGASTVTYFEANDQSTPKIIQIPIQSPPENNELRNPSAPIGKAAVKIQSAYRSHVVRNLVKKISAVNSEANYLQRLIQRQDTVDAVRSSEREKIRMNEALMNLLLRLDSVPGIDPSVRELRRDLSRRIVGLQEILDAVSDTKIQNWDGFLMDWDDVVERMEMDVCKERGGGDELEAFCAEHLGFRCLQRFLRDQ
	SIBAG5	Solyc06g007240	MRKKSSTSSKSKNEVIKDENYKYTEFEEEKKSCIIDWEVRPGGLLVQKRVGISAEENSVAGPMIKIKVSYDSCYHDVVVPAESTFGNLKKILWDTTGLHPNVQRLLFQGKEKDEKECLHISGVKDMSKVILMEDPASKELKKIQDTSISSQAIARVRVEVDKLSHRVVSIEEAVQRGTKVEDKEFVVLTELFMIQLLTLDGIEAEGEARTQRRKEVHRIQSFVDMIDNFKARNSSIVSNCIGTISMVNTKWEKFDSGIGSLNAPNQSPKVTQEWEVFD
	SIBAG6	Solyc06g035720	MMGMKTRTTGMPPIMNGGSVGSENEWELRPSGMLVQKRNLDSENRRPPPTIRVRVKYRSVNHEINISSQATFGELKKMLSGPTGLHHEDQKLLYKDKERENKTFLDIAGVKDKSKIVLIEDPISQEKRYLEMRKNAKVEKAAKTISDISLEVDRLARQVSALESVVSKGGKVVEKDVINLTELLMNQLLQLDGIIAEGDIKLQRKNQVRKVQKCVETLDVLKIKNSMPTNNGNHTPKDQSPPARPHQDYMYLNEQASSPVQQHQDRHSFRNSPVQSKQQHQSRHSTSGSVVITTQWETFDSTPAPLLDHFSSPTTTSSTHAAVAQSRISWDLL
	SIBAG7	Solyc06g072430	MEYPLYGSYWPQSARPGYSSNMRGIPVQSIHQKPAGIKQASKVVQIPVHFVSSDPERSVLASATKKPEPDRSGSALKIQKVFRGFLVRKSVKKIKLIRKEVEDVERKLLCRETAELICRDERERLRVNETLMSLLFKLDSIRGVDSGVRECRKAVIRKAIYLQEKVDCIVAAANQIAAEEENQSDELSEPVNQTGDIPNSTGKQDEDGKLTNQNELCHLSEQSVDVETQAASNDEKTPIEGEHDVAPLNEKRGGLQEVKQETDCPMLECVEESVERGEVEDKEEEEAHCLILSVAKMS
	SIBAG8	Solyc08g080320	MSSKELLRMKTKKANGNGVSSSGWEMRPGGMLVQKRSSDHNSNQSSNIVVPIIRLKVKYGSSYHEVKISSQATFGELKKMLAGPTGLHTEDQKIFYKEKEKDSRNFLDVSGIKDGSKLVLIEDEISREKRYLESRRNAKMENASKEITSIRLEIDKLAKQVANVEMDIYGGKKVTETLLLSLIEMLMTQLIKLDGITADGDLKLQRRMQVKRVQKYIETLDMLKIRNSTLGNDNAKVSMKHKNRIFTGQMAKSIYYQQEQRKMGNFADEKSPGPVVVTTKWETF
	SIBAG9	Solyc10g084170	MENLFNWSQPARRRYSSRGKPVQSVHEKSAGIKPATKVVQIPVHSVSSDPDRSQKPDELAQAEAPDRRSASALRIQKVFRGYMVRKNVKRIMSIRREVDEIERKLLFGETAELIRRDERERVRVNETLMSLLFKLDSIRGIDSGVRECRKGVIKKAISLQENVDSIVSGS
	SIBAG10	Solyc10g085290	MKESINSSTSCGDEAAWEIRPSGMLVQKRENDAAANPTIIIKVSYASQEFDLPVPPELTFGEVKSILSSIIGLEPKLQKLLFRGKEKEDHEYLHLVGVKDNSKVLVMEEEMVEEKIPEEVRVTTEISRGAEAVAEVRTEVDKLSEQVSAVQAVVFGGTNVEDKDIIHLTEMLMRQLLKLDGIEAAGEGRVQRKSEVRRVQNLVETLDAVKARNSNPFINNSNAVSVTTQWETFDSGVGSLNAPPPPRPVLEVGSINTPSPPRPVLGVGSMKASPPPRPAFGVGGLNTPPPPTPVLGVGSMNASTPSRPAFGVGGLNTPPPPTPLLGVGSMNASTPSRPVFGVGGLNTPPPPTPVLAVGSMNAPSARPVLGVGSQTTPPLRPPTTIVTEDWEQFE
Oryza sativa	OsBAG1	LOC_Os09g35630	MMRAKAKGTFPPAAAAMKESSAPPPPAAAAAAAREDEWEVRPGGMLVQKRSPDGDAPAAPVPTIRVKVKFNGVYHEIYINSQASFGELKKQLSAPTGLHPEDQKIVYKDKERDSKAFLDMAGVKDRSKMVLLEDPTAQAKRLLEQRRTDKAERAAKSISRISLDVDKLATKVTALEAIVGKGGRVVDADVVTLTEALMNELVKLDAIAAEGEVKVQRRMQEKRVQKYVESLDAIRAKNAASHNKASGNGHAKPRAPHLPPPVSQRRQFQAPPPAAPTTTKTAAAPAPPPTASWESFDLLSSMPSTSSSTVTTTMAAATTTTTTSPIPRFDWELF
	OsBAG2	LOC_Os08g43270	MMRGKDQKFPAMKKETAAVAKEEVWEVRPGGMLVQKRSPESEPPPGGAPVPTIRVKVKYNGVYHEIYINSQASFGELKKLLSEKTGLHPDDQKVVYRDKERDSKAFLDIAGVKDRSKMLLLEDPTAQAKRLLEERRHCKAERAAKSVSRVALDVDKLASKVSALEAIVSKGGRVVDADVVALTEALMNELVKLDSIAADGEVKEQRRVQEKRVQKYVEALDAIRAKTKKAAAAPPKARPPHLPPRPPPAQQQQRRQFQPPAPATATAPAPQTATASWESFDLLSSVPSTSSAPVTTMAPATTTTTSPSPRFEWELF
	OsBAG3	LOC_Os06g03640	MLGASPKAKKGATVKFGSMKNPPPPPVVGAAAGAAAAAAGGKVPAEEVWEVRPGGMLVQKRGGGADEEPVNVKPVPTIRVKVKHAGITHEIYINSQASFGELKKMVAARTGLHPDDQKVMYKDKERDSKAFLDMAGVKDRSKLVVVEDPEARARRLIEERRNGHLEKAAKAVAAVTAEVDKLAPKVAALDASVRKGEKVAENDVVQVTELLMNELLKLDAVVADGDVKAQRRLQVKRVQKYVETLDAVMAKNAAIVRKSGEKLTSKQHHHPPARQQQQQAHQHHQQPAAGQTRWEMFDLLSSLPSTSSASSTTTVSSTASSGAPPPLPPPANRLDWMLF
	OsBAG4	LOC_Os01g61500	MMSGVGGGRSGGRDAEGEWEVRPGGMLVQRRDGDTGPAVRLRVSHGASFRDVAVPAHSTFGELKGVLTQATGVEPERQRLFFRGKEKSDNEFLHTAGVKDGAKLLLLEKPAPANVEQRAEPVIMDESMMKACEAVGRVRAEVDRLSAKVCDLEKSVFAGRKIEDKDFVVLTELLMMELLKLDGIEAEGEARAQRKAEVRRVQGLVETLDKLKARNANPFSDQNKSVSVTTQWETFDNGMGSLNAPPPRVSSTQINTDWEQFD
	OsBAG5	LOC_Os11g31060	MASSSRRFFGYDPYDYYYTSSPYDYAYPYYTPAPAATDRRRHASPRFFPAAAADEEYRYGEPVETVDVLRPSSSRRSRARPVSVSVPVQFAGSETKAKAKGCESEMSPPRSVARIGREAAAVRVQAAARGFLARRMVREVRAVEAEAEGVARKVAAEAEALRRDARGRVALGEALMRLLLRLDAVHGAREYRRRVTKRVLALQDAVDALEHVPAAPPVEEEEEEARVVADDAAPALDMEEAHDAQEDMMTPSPAQDASQLADDAPAAVDAVDMEENEMAPGSPRAEEEHGVEAEPKPEVEIPVPEAGTEMEVDGGQATGGEAETEKAVEQVVGGEMQEAEEEAEGEWEMVTAESPLEAAAADDDVEAVESSAAPAARVDEPAVQDEEKEKEEGVEMKKV…
	OsBAG6	LOC_Os02g48780	MGSYHYTSTSHFFFAGGGEGEYSSYKGTGSTDTHRPTTVRIPVTTPGPERPPDDAAAARIQAAFRGHLVRRHAAAVRGADDEATRLERLLRRQETVDAVRGDERERARFSEALMAVLLRLDAVPGYYPAVREARRAVTRRVVGLQEVFDAVLAAPDAADTCGVPASLDQVLEGIWGESPAAPPPPPPPPPPAAVEVEEEVVRSPCWRRFFGGV
Arachis hypogaea L.	AhD7MIWJ		MMNMKNIINNNNVVPSYRQRTPSKVRTIPIHFVGSERSRENSAIKIQKVLRGFFVRNALKRIMGLRVELQSVEARVYASMEVIKRDQRERVRLSETIMNLLLKLDSVRVLSSWYGVRECRKSVIKKAIALQEMVESESACVVEENDAMVQEEEKVVEVSEEKEEEKMEVMDDDSGADIKCVSESCMNSSVEEKEEEKMEDSGVDIQCVSESYKIEEKEEGDGEREESVGTSLVEENENNCVVKNEEEEEEEEEEEEEEGNGDEERREGKHREMLEKMMEDNERMMKMMAKLCERNEMQTQLLTSLSKRVEQLERAFACDKMRRNKRRNCSDAKHKQNMNK
	AhG65IU1		MMNMKNIINNNNVVPSYRQRTPSKVRTIPIHFVGSERSRENSAIKIQKVLRGFFVRNALKRIMGLRVELQSVEARVYASMEVIKRDQRERVRLSETIMNLLLKLDSVRVLSSWYGVRECRKSVIKKAIALQEMVESESACVVEENDAMVQEEEKVVEVSEEKEEEKMEVMDDDSGADIKCVSESCMNSSVEEKEEEKMEDSGVDIQCVSESYKIEEKEEGDGEREESVGTSLVEENENNCVVKNEEEEEEEEEEEEEEGNGDEERREGKHREMLEKMMEDNERMMKMMAKLCERNEMQTQLLTSLSKRVEQLERAFACDKMRRNKRRNCSDAKHKQNMNK
	AhII6FYR		MIPVCRSMDSTYPYQRNQSPYPPFYYPGFEPNLPQMNMNPPKSPFPYEHPWSHGGCCGHYSNPTNFCCAHNNNFHGYYNYRPQHYHHHHAPFPSPPMYYSGGYQEPLFVPYAPQPHYTMELPRYDYEKHMPGDYHCCGCPNHPCHQKEEHSVKIEEEEPDNNAGNKVNNDEALAPIQTSNYPYPYPIVWIPPEYTRTRNKEAKSGSIAEAKGEQDQISHDRKPSSPMNFQEPRIWNGWLPFDMNHKPNKVLEGDGRRNKNLESESNKRVYDDGKGMNNKNQSENQISEFPFPIFWMPYYNKQEEAGKENNQESHSSPKCIEEAPHTFKSVPVNSKADEVVRNGTMSNPVESIDRSGPAGTKDVTNEKIIPVKEVELHQGRNNSNENAKRERIIPVKQIE…
	AhYSVF0U		MIPVCRSMDSTYPYQRNQNPYPPFYYPGFEPNLPQMNMNPPKSAFPYEHPWSHGGCCGHYPNPTNFCCAHNNNFHGYYNYRPQHYHHHHAPFPSPPMYYSGGYQEPFFVPYAPQPHYTMELPRYDYEKHMPGDYHCCGCPNHPCHQKEEQSVKIEEEEPDNNAGNKVNNDEALAPIQTRNYPYPYPIVWIPPEYTRTRNKEAKSGSIAEAKGEQDQISHDRKASSPMNFQEPRIWNGWLPFDMNHTPNKVLEGDGRRNKNLESESNKRVYDDGKGMNNKNQCENQRSEFPFPIFWMPYYNKQEEVGKENNHESHSSPKCVKEAPHTFKSVPVNSKADEVVRNGTMSNPVESIDRSGSDETKDVTNEKIIPVKEVELHQGRNNSNENAKRERIIPVKQIE…
	Ah4JG1SZ		MNHSSRSTTAVSHHNDHSAPPESKISNPALTIQSAFRAHRIRTLYRKISTVDSEADRLQRLIQRQETVDAVRTNPLQKLAINESLMSLLLTLDSVPGFDPTVREARRKITRRIVSLQEILDSVSECKFDEWGWWNSYDDVLVRNWDQVIEDMEESVCRERGGDDMDKFCAQYLGFRCLQRFLREP
	AhJ75SJQ		MNHSSRSTTAVSHHNDHSAPPESKISNPALTIQSAFRAHRIRTLYRKISTVNSEADRLQRLIQRQETVDAVRTNPLQKLAINESLMSLLLTLDSVPGFDPTVREARRKITRRIVSLQEILDSVSECKFDEWGWWNSYDDVLVRNWDQVIEDMEESVCRERGGDDMDKFCAQYLGFRCLQRFLREP
	Ah35MDCZ		MKMKRISLSSSKRAPATNNNNNNYMMVEESSISIDWEVRPGGMLVQKRQEKIVDSSSSSFSSSCSSPMIKVKVSHGCNHHEVNVPSQSTFGHLKVVLASETGLEPKEQRLIFRGKEKEDEECLHMEGVKDMSKVVDLERTVCGGIKVEDKEFVVLTELLMVQLLELDSIAADGEAKVQRRIEVQRIQSYVDKIDKIKARNSAPLGNDANNNAVSVTTKWEPFESGIGSFTSPTPFKSSTTIITQNWELFE
	Ah9JS9HJ		MKMKRISLSSSKRAPATNNNNNYYMMVKESSISIDWEVRPGGMLVQKRQEKIVDSSSSSSCSSPMIKVKVSHGCNHHEVNVPSQSTFGHLKGVLASETGLEPKEQRLIFRGKEKEDEECLHMEGVKDMSKVVDLERTVCGGIKVEDKEFVVLTELLIVQLLELDSIAADGEAKVQRRIEVSDINYKASCCFVQRVQSYVDKIDKIKARNSAPLGNDANNNAVSVTTKWEPFESGIGSFTSPTPFKLSTTIITQNWELFE
	AhED3VG4		MSHNKETTTMSSNNMFSKGKKSGHECELRPGGMLVQKRDSNSDRNSDSAAMSTIMVKVKYGSAYHELRVSSHASFGELKKMLRECTGLHAQDQKLMFKKKERDSKSYLDVERVRDGSKLVLFEKIESRERRMLETLRIAKKEKTSKSLKEINHQVQPLAHKVSALEAGASTGEVVAELHIESLTENLMRILITLNEIFAEGDLKLQKSEQVRRVQKHIETLDTLKMKREKNVPQKIKAVEEQQLKHWDSVVVTTKWETFD
	AhTEF0AP		MMRMRNGESNSNKTNGLMVSNGGEAGSKEWEMRPGGMLVQMRTADSDRNSVPPPTIRVRVKYNSIYHEVNINSQATFGELKKMLSGSTGLHHQDQKLFYKDKERDSKAFLDMVGVKDKSKMVLKEDPISQEKRFLELRKNAKMEKAAKSISEISLDVDRLAGRVSAFETIINKGGKVAETDVSGLIELLMNQLLKLDGITADGDVKLQRKMQVKRVQKYVETLDMLKVKNSVPNSNGDYGPPPKHSNGQRLAPIQEQPQQQTHSNGNHMLIPIDEEEQEATPRNTNGHFQKQQHENQSTRHSSTSGVVVTTQWETFDSAPPLIPVPSSTSVTNNNNSGHQKFNWDIFN
	AhADAM8V		MMRMRNGESNSNKTNGLMVSNGGEAGSKEWEMRPGGMLVQMRTADSDRNSVPPPTIRVRVKYNSIYHEVNINSQATFGELKKMLSGSTGLHHQDQKLFYKDKERDSKAFLDMVGVKDKSKMVLKEDPISQEKRFLELRKNAKMEKAAKSISEISLDVDRLAGRVSAFETIINKGGKVAETDVSGLIELLMNQLLKLDGITADGDVKLQRKMQVKRVQKYVETLDMLKVKNSVPNSNGDHGPPPKHSNGQRLAPIQEQPQQQTHSNGNHMLIPIDEEEQEATPRNTNGHFQKQQHENQSTRHSSTSGVVVTTQWETFDSAPPLIPVPSSTSVTNNNNSGHQKFNWDIFN
	Ah37JSRQ		MMRMRNMTNNYGVSAVNNGSEATTTRAMEWEMRPGGMLVQRRTDDSDRNSVPPAPTIRVRVKYGSTYHEVNISSQATFGELKKMLSGPTGLHHQDQQIYYKDKERDSKAFLDIVGVKDKSKLVLVEDPLSQERRYLEMRKNAKMEKAAKSISEISLEVDRLAARVSALESIISKGGKVAEIDVISLIELLMNQLLKLDGIMADGDVKLQRKMQVKRVQKYVETLDMLKIKNSMGNANNGGHHASVKAQQRHSNVHRLATIQEQPQSQGVSNGNNHRSATIQEQQQQNQPSEVVVTTKWETFDSLPPLIPVSSSTSTSASPLNNGNNNNSNNNSVHHKFNWEFFD
	AhCF9SCE		MRAIHTFTHQMMRMRNMTNNYGVSAVNNGSEATTTRAMEWEMRPGGMLVQRRTDDSDRNSVPPAPTIRVRVKYGSTYHEVNISSQATFGELKKMLSGPTGLHHQDQKIYYKDKERDSKAFLDIVGVKDKSKLVLVEDPLSQERRYLEMRKNAKMEKAAKSISEISLEVDRLAARVSALESIISKGGKVAEIDVISLIELLMNQLLKLDGIMADGDVKLQRKMQVKRVQKYVETLDMLKIKNSMGNANNGGHHASVKAQQRHSNVHRLATIQEQPQSQGVSNGNNHRSATIQEQQQQQNQHSEVVVTTKWETFDSLPPLIPVSSSTSTSASPLNNGNNNNSNNNSVHHKFNWEFFD

## Sheet: Table S4
Expression of AhBAG genes in different tissues
GeneName	Leaf	Root	Nodule	Perianth	Stamen	Pistil	Peg tip	Fruit pat	Seed pat
AhD7MIWJ	0.00676481	0	0	0	0	0	0.0103915	0	0
AhG65IU1	0.00676481	0.0824672	0.0521716	0.045783	0	0.0908731	0.722742	0	0.0143034
AhII6FYR	29.6661	9.00055	25.5974	1.26397	1.51165	61.9327	16.3248	9.31077	30.133
AhYSVF0U	89.2528	36.1982	118.072	5.55132	7.49688	177.889	34.8982	37.8401	68.6641
Ah4JG1SZ	7.13921	10.3943	26.0727	2.27412	10.6113	3.79213	18.6905	28.7102	19.3895
AhJ75SJQ	7.64481	15.9143	29.4995	2.51064	9.2499	4.87218	21.9286	36.2234	17.8826
Ah35MDCZ	0.47007	1.07423	0.0953005	1.19942	0.137806	0.490995	0.515579	0.34533	1.63199
Ah9JS9HJ	0.727475	1.80298	0.0847221	2.36893	0.175308	0.800245	0.759317	0.440341	1.36159
AhED3VG4	0.247068	0.23509	0.0187357	0.0246191	0.0399637	0.0646739	0.153586	0.139273	0.652693
AhTEF0AP	12.4216	14.971	12.9289	44.2053	5.51889	12.7369	13.0662	11.8192	2.98986
AhADAM8V	12.7509	10.4201	8.16767	46.6612	9.56232	21.0427	10.3921	6.20026	3.05838
Ah37JSRQ	5.71052	10.0325	12.9481	10.0712	8.04319	4.27593	18.7295	14.8274	7.20393
AhCF9SCE	4.42222	7.8799	8.53595	5.77768	5.88577	2.52347	14.9802	12.218	6.06529
